# Supplementary material for: Differences in Stability of Viral and Viral-Cellular Fusion Transcripts in HPV-Induced Cervical Cancers
Source: PubMed Central journal article supplement (PMC6981427; doi:10.3390/ijms21010112), 2019-12-23
Supplement: ijms-21-00112-s001.pdf [file ijms-21-00112-s001.pdf]

# Stability of viral and viral-cellular fusion transcripts in cervical cancers

Franziska Ehrig, Norman Häfner, Corina Driesch, Katrin Beer, Matthias Dürst

Department of Gynecology, Jena University Hospital – Friedrich Schiller University Jena, 07747 Jena, Germany

## Supplementary File S1

### Nucleotide sequences of analyzed transcripts

#### 1. Episome-derived transcript HPV16epi-plusUTR

```
ATGCACCAAA AGAGAACTGC AATGTTTCAG GACCCACAGG AGCGACCCAG
AAAGTTACCA CAGTTATGCA CAGAGCTGCA AACAACTATA CATGATATAA
TATTAGAATG TGTGTACTGC AAGCAACAGT TACTGCGACG TGAGGTGTAT
TAACTGTCAA AAGCCACTGT GTCCTGAAGA AAAGCAAAGA CATCTGGACA
AAAAGCAAAG ATTCCATAAT ATAAGGGGTC GGTGGACCGG TCGATGTATG
TCTTGTTGCA GATCATCAAG AACACGTAGA GAAACCCAGC TGTAATCATG
CATGGAGATA CACCTACATT GCATGAATAT ATGTTAGATT TGCAACCAGA
GACAACTGAT CTCTACTGTT ATGAGCAATT AAATGACAGC TCAGAGGAGG
AGGATGAAAT AGATGGTCCA GCTGGACAAG CAGAACCGGA CAGAGCCCAT
TACAATATTG TAACCTTTTG TTGCAAGTGT GACTCTACGC TTCGGTTGTG
CGTACAAGC ACACACGTAG ACATTCGTAC TTTGGAAGAC CTGTTAATGG
GCACACTAGG AATTGTGTGC CCCATCTGTT CTCAGAAACC ATAACTACC
ATGGCTGATC CTGCAGAGCA ACGAAGTATC CTCTCCTGAA ATTATTAGGC
AGCACTTGGC CAACCACCCC GCCGCGACCC ATACCAAAGC CGTCGCCTTG
GGCACCGAAG AAACACAGAC GACTATCCAG CGACCAAGAT CAGAGCCAGA
CACCGGAAAC CCCTGCCACA CCACTAAGTT GTTGACACAGA GACTCAGTGG
ACAGTGCTCC AATCCTCACT GCATTTAACA GCTCACACAA AGGACGGATT
AACTGTAATA GTAACACTAC ACCCATAGTA CATTTAAAAG GTGATGCTAA
TACTTTAAAA TGTTTAAAGAT ATAGATTTAA AAAGCATTGT ACATTGTATA
CTGCAGTGTC GTCTACATGG CATTGGACAG GACATAATGT AAAACATAAA
AGTGCAATTG TTACACTTAC ATATGATAGT GAATGGCAAC GTGACCAATT
TTTGTCTCAA GTTAAAATAC CAAAAACTAT TACAGTGTCT ACTGGATTTA
TGTCTATATG ACAAATCTTG AACTGTCATC CACAACATTA CTGGCGTGCT
TTTTGCTTTG CTTTGTGTGC TTTTGTGTGT CTGCCTATTA ATACGTCCGC
TGCTTTTGTC TGTGTCTACA TACACATCAT TAATAATATT GGTATTACTA
TTGTGGATAA CAGCAGCCTC TCGTTTTAGG TGTTTTATTG TATATATTAT
ATTTGTTTTAT ATACCATTAT TTTTAATACA TACACATGCA CGCTTTTAA
TTACATAATG TATATGTACA TAATGTAATT GTTACATATA ATTGTTGTAT
ACCATAACTT ACTATTTTTT CTTTTTTTATT TTCATATATA ATTTTTTTTTT
TTGTTTGTTT GTTTGTTTTT TAATAAAA
```

#### Legend:

|                |                                      |
|----------------|--------------------------------------|
| HPV-16 E6*I    | nt 83-226, 409-559                   |
| HPV-16 E7      | nt 562-858                           |
| HPV-16 E1      | nt 865-880                           |
| HPV-16 E4      | nt 3358-3620                         |
| HPV-16 E5      | nt 3850-4099                         |
| Poly-A signals | AATAAA or ATTAAA                     |
| ATTTA          | "AUUUA" motif, ARE (AU-rich element) |
| nt in black    | non-coding regions e.g. UTR          |

## 2. Episome-derived transcript HPV16epi-minusUTR

ATGCACCAAA AGAGAACTGC AATGTTTCAG GACCCACAGG AGCGACCCAG  
AAAGTTACCA CAGTTATGCA CAGAGCTGCA AACAACTATA CATGATATAA  
TATTAGAATG TGTGTACTGC AAGCAACAGT TACTGCGACG TGAGGTGTAT  
TAACTGTCAA AAGCCACTGT GTCCTGAAGA AAAGCAAAGA CATCTGGACA  
AAAAGCAAAG ATTCCATAAT ATAAGGGGTC GGTGGACCGG TCGATGTATG  
TCTTGTTGCA GATCATCAAG AACACGTAGA GAAACCCAGC **TGTAATCATG**  
CATGGAGATA CACCTACATT GCATGAATAT ATGTTAGATT TGCAACCAGA  
GACAACTGAT CTCTACTGTT ATGAGCAATT AAATGACAGC TCAGAGGAGG  
AGGATGAAAT AGATGGTCCA GCTGGACAAG CAGAACCGBA CAGAGCCCAT  
TACAATATTG TAACCTTTTG TTGCAAGTGT GACTCTACGC TTCGGTTGTG  
CGTACAAAGC ACACACGTAG ACATTTCGTAC TTTGGAAGAC CTGTTAATGG  
GCACACTAGC AATTGTGTGC CCCATCTGTT CTCAGAAACC **ATAATCTACC**  
**ATGGCTGATC CTGCAGAGCA ACGAAGTATC CTCTCCTGAA ATTATTAGGC**  
AGCACTTGGC CAACCACCCC GCCGCGACCC ATACCAAAGC CGTCGCCTTG  
GGCACCGAAG AAACACAGAC GACTATCCAG CGACCAAGAT CAGAGCCAGA  
CACCGGAAAC CCCTGCCACA CCACTAAGTT GTTGACACAGA GACTCAGTGG  
ACAGTGCTCC AATCCTCACT GCATTTAACA GCTCACACAA AGGACGGATT  
AACTGTAATA GTAACACTAC ACCCATAGTA **CATTTAAAAG** GTGATGCTAA  
TACTTTAAAA TGTTTAAAGAT ATAGATTTAA AAAGCATTGT ACATTGTATA  
CTGCAGTGTC GTCTACATGG CATTGGACAG GACATAATGT AAAACATAAA  
AGTGCAATTG TTACACTTAC ATATGATAGT GAATGGCAAC GTGACCAATT  
TTTGTCTCAA GTTAAAATAC CAAAAACTAT TACAGTGTCT **ACTGGATTTA**  
TGTCTATATG ACAAATCTTG ATRACTGCATC CACAACATTA CTGGCGTGCT  
TTTTGCTTTG CTTTGTGTGC TTTTGTGTGT CTGCCTATTA ATACGTCCGC  
TGCTTTTGTC TGTGTCTACA TACACATCAT TAATAATATT GGTATTACTA  
TTGTGGATAA CAGCAGCCTC TCGTTTAGG TGTTTTATTG TATATATTAT  
ATTTGTTTAT ATACCATTAT TTTTAATACA TACACATGCA CGCTTTTAA  
TTACATAA

### Legend:

HPV-16 E6\*I      nt 83-226, 409-559  
HPV-16 E7        nt 562-858  
HPV-16 E1        nt 865-880  
HPV-16 E4        nt 3358-3620  
HPV-16 E5        nt 3850-4099  
Poly-A signals   **AATAAA or ATTAAA**  
**ATTTA**            "AUUUA" motif, ARE (AU-rich element)  
nt in black      non-coding regions e.g. UTR

### 3. Fusion transcript HPV16-MAP4

ATGCACCAAA AGAGAACTGC AATGTTTCAG GACCCACAGG AGCGACCCAG  
AAAGTTACCA CAGTTATGCA CAGAGCTGCA AACAACTATA CATGATATAA  
TATTAGAATG TGTGTACTGC AAGCAACAGT TACTGCGACG TGAGGTGTAT  
TAACTGTCAA AAGCCACTGT GTCCTGAAGA AAAGCAAAGA CATCTGGACA  
AAAAGCAAAG ATTCCATAAT ATAAGGGGTC GGTGGACCGG TCGATGTATG  
TCTTGTTGCA GATCATCAAG AACACGTAGA GAAACCCAGC TGTAATCATG  
CATGGAGATA CACCTACATT GCATGAATAT ATGTTAGATT TGCAACCAGA  
GACAACTGAT CTCTACTGTT ATGAGCAATT AAATGACAGC TCAGAGGAGG  
AGGATGAAAT AGATGGTCCA GCTGGACAAG CAGAACCGBA CAGAGCCCAT  
TACAATATTG TAACCTTTTG TTGCAAGTGT GACTCTACGC TTCGGTTGTG  
CGTACAAGC ACACACGTAG ACATTTCGTAC TTTGGAAGAC CTGTTAATGG  
GCACACTAGG AATTGTGTGC CCCATCTGTT CTCAGAAAACC ATAACTTACC  
ATGGCTGATC CTGCAGCCAT TAAGACTGAG GGAAAACCTG CAGAAGTCAA  
GAAGATGACT GCAAAGTCTG TACCAGCTGA CTTGAGTCGC CCAAAGAGCA  
CCTCCACCAG TTCCATGAAG AAAACCACCA CTCTCAGTGG GACAGCCCCC  
GCTGCAGGGG TGGTTCCAG CCGAGTCAAG GCCACACCCA TGCCCTCCCG  
GCCCTCCACA ACTCCTTTCA TAGACAAGAA GCCCACCTCG GCCAAAACCA  
GCTCCACCAC CCCCCTGGCTC AGCCGCCTGG CCACCAATAC TTCTGCTCCT  
GATCTGAAGA ATGTCCGCTC CAAGGTTGGC TCCACGGAAA ACATCAAGCA  
TCAGCCTGGA GGAGGCCGGG CCAAAGTAGA GAAAAAACA GAGGCAGCTG  
CTACAACCCG AAAGCCTGAA TCTAATGCAG TCACTAAAAC AGCCGGCCCA  
ATTGCAAGTG CACAGAAACA ACCTGCGGGG AAAGTCCAGA TAGTCTCCAA  
AAAAGTGAGC TACAGCCATA TTCAGTCCAA GTGTGGTTCC AAGGACAATA  
TTAAGCATGT CCCTGGAGGT GGTAATGTTT AGATTTCAGAA CAAGAAAGTG  
GACATCTCTA AGGTCTCCTC CAAGTGTGGG TCTAAGGCTA ACATCAAGCA  
CAAGCCTGGT GGAGGAGATG TCAAGATTGA AAGTCAGAAG TTGAACTTCA  
AGGAGAAGGC CCAGGCCAAG GTGGGATCCC TCGATAATGT GGGCCACCTA  
CCTGCAGGAG GTGCTGTGAA GACTGAGGGC GGTGGCAGCG AGGCTCCTCT  
GTGTCCGGGT CCCCCTGCTG GGGAGGAGCC GGCCATCTCT GAGGCAGCGC  
CTGAAGCTGG CGCCCCACTG TCAGCCAGTG GCCTCAATGG CCACCCACC  
CTGTGAGGGG GTGGTGACCA AAGGGAGGCC CAGACCTTGG ACAGCCAGAT  
CAGGAGACAA GCATCTAATG ATGACATTCT GGTCTCGTCT TCCGTCTCCC  
CCGTGTTCCC CTCTTGTCTC CCCTGTTCCC CTCTCCCTTC CCTCCTCCCA  
TGTCACTGCA GATTGAGACC TACAGGCTGA CGTTCCGGGC AAATGCCAGG  
GCCCCACCG ACCACGGGGC CGACATTGTC TCCCGCCCCC CACACTTCCC  
TGGCGGCCCC AACTCGGGCT CCCGGGTCTT TGGCCCCCTT TCCCGGGCTG  
TCCACTAGAC CAGTGAGCGC TTGGGCGCCG TGCTGGGCAG CCCGCTAGGC  
TCGCCTTCCC TCCTGCTTTG CGTGCCCGGG GCAGCAGCAG CCCTGCCCCA  
CACCTCCTCT CACTCCCCAG CCTGGGCCCA TCTCCCTGCT TTGGTCTTGC  
CCCATCACTG CGCCACTGCT CCGTGGAGGA GGTGGGAGG GGGTTGGGGT  
GGTTGAGGCT AAGTTGGGAT CTAGGAGAGG AGAACCAGAT TCTATCCTCA  
TCTTTTTTTG GTTCTTTGGT CCAAACCCAA AAGAAACTGA CATGCCCTCC  
CTTCTCCCTG GATCTACCTG GAGGGAAGAG TGGAGGTGGA TTCCGAGTGG  
TGACAGGACG CTGACCGTGG AGCTTAAGCC ACTGCCTCTC CCTCTGGTCC  
CACAAATGGG CGCCCCCCCC TCCCCATGCA GGTGGTGTCTG GGCCCTTCTT  
GCTGCCCTGC CCCAAGTTGG GGGTCAGTGC TGCCTGTCCC CATGCTTAAC  
ATACCCGCTC AGCTGCTGTC ACATTTTCT TGTTTTGTCC TTTTATTTTT  
TTCTAATAAC CTA AAAACTG CAAAATAGT TCTGCAGGTT GAAGCCATGT  
CTACATGAAA GTCCTCAGTA AGTGTTAGAG GGAACAGGGC GGAGATATCC  
TTATGCCACC CCCGCTGGAG GATGTGGGCA GCTTAGGGCC CTGGAGGCGG  
TGCGGCAGGG AAGAGGGGTG CAGAGGCTGT GGCTGGTGGAG CCGGTGAGGC  
ACACAAGGGG CCCTTGGAGC GTGGACTGGT TGGTTTTGCC ATTTTGTGTG  
GTGTATGCTG CTTTTCTTTT CTAACCAAGA GGCTGGTTTTT GGCATCTCTG  
TCCCATTCCC TGGGATCTGG TGGTCAGCCC TAGGATAAAA AGCCAGGGCT  
GGAGAACAAG AAAGGGCCAG GAGATGGAAT TC

#### Legend:

HPV-16 E6\*I nt 83-226, 409-559  
HPV-16 E7 nt 562-858  
HPV-16 E1 nt 865-880  
cellular exons  
Poly-A signals AATAAA or ATTAAA  
ATTTA "AUUUA" motif, ARE (AU-rich element)  
nt in black non-coding regions e.g. UTR

#### 4. Fusion transcript HPV16-EIF1

ATGCACAAA AGAGAAGTGC AATGTTTCAG GACCCACAGG AGCGACCCAG  
AAAGTTACCA CAGTTATGCA CAGAGCTGCA AACAACTATA CATGATATAA  
TATTAGAATG TGTGTACTGC AAGCAACAGT TACTGCGACG TGAGGTGTAT  
TAACTGTCAA AAGCCACTGT GTCCTGAAGA AAAGCAAAGA CATCTGGACA  
AAAAGCAAAG ATTCCATAAT ATAAGGGGTC GGTGGACCGG TCGATGTATG  
TCTTGTTGCA GATCATCAAG AACACGTAGA GAAACCCAGC TGTAATCATG  
CATGGAGATA CACCTACATT GCATGAATAT ATGTTAGATT TGCAACCAGA  
GACAACTGAT CTCTACTGTT ATGAGCAATT AAATGACAGC TCAGAGGAGG  
AGGATGAAAT AGATGGTCCA GCTGGACAAG CAGAACCGBA CAGAGCCCAT  
TACAATATTG TAACCTTTTG TTGCAAGTGT GACTCTACGC TTCGGTTGTG  
CGTACAAAGC ACACACGTAG ACATTTCGTAC TTTGGAAGAC CTGTTAATGG  
GCACACTAGG AATTGTGTGC CCCATCTGTT CTCAGAAACC ATAACTACC  
ATGGCTGATC CTGCAGACCC CTTTGCTGAT GCAAGTAAGG GTGATGACCT  
GCTTCCTGCT GGCACAGAGG ATTATATCCA TATAAGAATT CAACAGAGAA  
ACGGCAGGAA GACCCTTACT ACTGTCCAAG GGATCGCTGA TGATTACGAT  
AAAAAGAAAC TAGTGAAGGC GTTTAAGAAA AAGTTTGCCT GCAATGGTAC  
TGTAATTGAG CATCCGGAAT ATGGAGAAGT AATTCAGCTA CAGGGTGACC  
AACGCAAGAA CATATGCCAG TTCCTCGTAG AGATTGGACT GGCTAAGGAC  
GATCAGCTGA AGGTTTCATGG GTTTTAAGTG CTTGTGGCTC ACTGAAGCTT  
AAGTGAGGAT TTCCTTGCAA TGAGTAGAAT TTCCCTTCTC TCCCTTGTC  
CAGGTTTAAA AACCTCACAG CTTGTATAAT GTAACCATTT GGGGTCCGCT  
TTTAACTTGG ACTAGTGTAA CTCCTTCATG CAATAAACTG AAAAGAGCCA  
TGCTGTCTAG TCTTGAAGTC CCTCATTTAA ACAGAGGTCA AGCAATAGGC  
GCCTGGCAGT GTCAAGCCTG AAACCAAGCA ATACCGTCAT GTTTCAGCCA  
AGCCCAGAGC CCTAAGATTA CAAACAATA TGGCCGGAAC CTCCTCAGCT  
CTCCCTCTGC AGAGTTCCCT ACCCTAAGAG AATGTTACCA CCTGAACAGT  
CCTCGGTGAA TCTGAGAGGA GAGGATGGGG TAAGGCAGAA GCACCAGCTG  
TACTACTAGA AGGAGCTTTT GGTGGTAGAT CCCCTGGTGT CTCCAACCTG  
ACTAGGTGGA CAGAGCTCAA AGAGGCCCTC TTACCGCTAG CGAGGTGATA  
GGACATCTGG CTTGCCACAA AGGTCTGTTC GACCAGACAT ATCCTAGCTA  
AGGGATGTCC AAACATCAGA ATGTGAGGCC AACCTTCTAT CAGAGTTAAA  
CTTTTGACAA GGAACAAAT CTCAAACTGA TCCATCAGTC ATGTAGCTAG  
CTGTAGAGCT TGCAACTTAA TAGCAGCAGC TGCCCAATGC CATGTGAAGT  
AACAACTGG TTTTTGGTTT TTTTTTCCCC TTCAGTTTTA ATGTTATGTG  
TAATGTATTT AAACCCTTAT TTAATAAAA CTTGTTTTCA GAAATACCTG  
ACTTGCA

#### Legend:

HPV-16 E6\*I nt 83-226, 409-559  
HPV-16 E7 nt 562-858  
HPV-16 E1 nt 865-880  
cellular exons  
Poly-A signals AATAAA or ATTAAA  
ATTTA "AUUUA" motif, ARE (AU-rich element)  
nt in black non-coding regions e.g. UTR

## 5. Fusion transcript HPV16-FAM110B

ATGCACCAA AGAGAAGTGC AATGTTTCAG GACCCACAGG AGCGACCCAG  
AAAGTTACCA CAGTTATGCA CAGAGCTGCA AACAACTATA CATGATATAA  
TATTAGAATG TGTGTACTGC AAGCAACAGT TACTGCGACG TGAGGTGTAT  
TAACTGTCAA AAGCCACTGT GTCCTGAAGA AAAGCAAAGA CATCTGGACA  
AAAAGCAAAG ATTCCATAAT ATAAGGGGTC GGTGGACCGG TCGATGTATG  
TCTTGTTGCA GATCATCAAG AACACGTAGA GAAACCCAGC TGTAATCATG  
CATGGAGATA CACCTACATT GCATGAATAT ATGTTAGATT TGCAACCAGA  
GACAACTGAT CTCTACTGTT ATGAGCAATT AAATGACAGC TCAGAGGAGG  
AGGATGAAAT AGATGGTCCA GCTGGACAAG CAGAACCAGG CAGAGCCCAT  
TACAATATTG TAACCTTTTG TTGCAAGTGT GACTCTACGC TTCGGTTGTG  
CGTACAAAGC ACACACGTAG ACATTTCGTAC TTTGGAAGAC CTGTTAATGG  
GCACACTAGG AATTGTGTGC CCCATCTGTT CTCAGAAACC ATAACTTACC  
ATGGCTGATC CTGCAGCTCT GCCTGCAGTT GAACACAAAG ACCTGGAGGA  
GACTCCCACCT CCTTCAGGGA GAAGAAAGGA GGCAGCGAAG CAGATTAAG  
GAACTTGTGG CTTGTGGCCT TTTTGTGCAA GGGCCGCTG GAAGGGGAGA  
AAAGTGTATG AAAGCCACCG TGGCGGTTAA TGAGCTGTGA GATGAGGCGC  
TGCTGCGGCC GCTGCTGCTG ACACTCGCTC CCAGGCTGCA CCCGCCGCC  
TTGGCGCTTC ATGTACATGT GTCTATTCAG GCCTTGCGGA GCGGCCAGA  
AGAGCATCCA ACACGGCTGC CGGGGAAAGA CCGCCACCA TGCCACGGA  
GACCCTACAG ACAGGTAGCA TGGTGAAGCC GGTGAGCCCC GCGGGCACCT  
TCACCTCTGC TGTGCCCTG CGCATCCTGA ACAAGGGGCC AGACTACTTC  
CGCAGGCAGG CCGAGCCCAA CCCCAGAGG CTCAGCGCCG TGGAGAGGCT  
GGAGGCCGAC AAGGCCAAGT ACGTCAAGAG CCAGGAGGTG ATCAACGCCAA  
GCAGGAGCCC GTGAAGCCCG CCGTGCTGGC CAAGCCCCCG GTGTGCCCGG  
CTGCCAAGCG CGCACTGGGC AGCCCCACGC TCAAAGTGTT CGGCAACCAC  
GCCAAGACCG AGAGCGGCGT GCAGAGGGAG AACCTGAAGC TGGAGATCCT  
GAAGAACATC ATCAATAGCT CCGAGGGCTC TAGCTCGGGC TCGGGGCACA  
AGCACAGCTC CCGCAACTGG CCGCCCCACC GGTGCGAAGC CACTGACCTG  
CACCGTCACT CTTTCGCGGA GTCCCTGAAG GTCTACCCCA CGCAGGGCCG  
CAGGAGCCCC CAGGAGGGCG GCTCCCACGT GGGCAGGAGA CTGCTGGAGC  
AGTCAGCCGA GTCCTTCCCT CACGTGTCCC ACAGCTCTTC GGACATCCGC  
AAGGTGACCA GCGTGAAGCC CCTCAAGGCC ATCCCCTGCA GTAGCTCTGC  
CCCTCCCCTG CCTCCCAAGC CCAAAATCGC AGCCATCGCC TCCATGAAGT  
CCCCCGAGGC CGACCCTGTG GAACCAGCTT GTGGAGTCAG CCGAAGACCC  
TCCCTCCAGC GGTCTAAGTC AGACTTGAGT GACAGATATT TCCGAGTGA  
CGCGGACGTG GAGAGGTTT TCAACTACT GTGGACTGGA CCCGGAAGAG  
CTGGAAAACC TGGGAATGGA AAACCTTGCA AGGGCTAATT CTGACATAAT  
ATCCCTCAAC TTCCGCAGCG CAAGCATGAT CAGCTCAGAC TGTGAACAGT  
CTCAGGACAG TAACAGTGAC CTTAGAAATG ATGACAGTGC CAATGACCGC  
GTGCCGTATG GCATTTCTGC CATCGAAAGA AATGCTAGAA TCATCAAGTG  
GTTATATAGC ATCAAACAAG CTAGAGAGTC ACAGAAGGTC TCCCATGTGT  
AAGACAGTGC GTGGAAAGGA GGGAGCGTGG GTCTCTGTGC TTACGCAGTT  
GTGAAGGTTG TGAGGTCTCC TTGAAGTGTT GTGAGCTTCT CCACTCTTTG  
TGTTGCTTGT TGTGCAATGT TTTCAAGTTG CATGCTTGTC AACATGGGGA  
CTGACCTGGC TTCCACGTCA CCATCGCTAC AGAGCCTGGC TGAACACGCG  
TCATCTGCCA AAAGTTTCAG GCCAGAATCT AATTAGGGCT TTGCTCGTAA  
GCAAAACTGT TTACATGAAA ATGGTATACA ACTTCTTCGA TATTTATGTG  
GTTCTTGTGT TTTTATATCC CGCGCTATTG TGTCTTAATT AAAAGTTTAA  
TCAACTGGCT TTTAAGTTGA GAGCAGAATC TTTTGAAT AAAAAGCCAC  
TTTGCTACA TGTGAGACTA TTCCAGTGGG ACAGTAAATG GGATCTGCTA  
CCAAACAGAT AATGACTGAC CGAACATAGA ACCAGGCTGG GTTTTCTGTG  
GAATAAAGTG GTGAGCCTGA CGTTAATCGT TTACATGTTG AAATTCTCTT  
GCCACTTAGT GAAGCAGTCA TTGGGGTAAC AATGCTACGT TTTGTGTCCG  
ATTCAGTGTG TAAACGTTGG TGGTTCTATG TAATACTGAC CCCAAGGAAA  
GACGATCAGA TACAAAGAAA GATGGTTAAA TCTAGGAGGT TGGGTGTTTG  
GGGGTTTTGT TGATGTTGTT CTGATTGGGA TAATTCAGAA ATTCCTAATA  
TTATCTTTTC ACAGAATGAC CACCCTAAAA CAAATACTGA ATGCCTTTAA  
AAAAAAAAAA AGTTGTGGTT TTTTGTTTTT TTTTTTTTTT TTTTTGGTTCG  
AGAACTACTA ATTTTCATGCT ATTTCTTTCT CTCTCCCTTT GTTGTATTTT  
GATTTGGGGG AAGGGAGTGA GGCTTGTGCA GATTTGAGCT ATCTGAAGAC  
ATGAACAGAA GTCAAATACC AGCCATATCA GTAGAGCCTT CCATTCAAAA  
GTGAACACAC TTGGTAGCTG AACCATATCT GAGCAGCGTG ATTCTGTTGT

CTTGATATG TTATTCTCTC AGGCTGTGGA TCTTTGTTAC AGCTCTAGGA  
AACTGTAGAA ATACAATGCT ATGTAGCTTT TCCACCCCAT GGTCTCTAGT  
GCTGCCTATC AACTTGTCCC CTTTTTTCCC AATAACCTGT CTTCCAGGTG  
GTACAGTTAG CTGTCACTCA GCTGACACCA TGATGTGGCA GCAGAGAGGG  
AAACCTACAA GTGGTTTGCC TCATTGCCTT TGCCACATCT GAAGTTCTCA  
GCAGCACTAC CTTAGACTTC ATGAGCTAAT AGGAACTTT TTATGGTGTA  
AATGCTGTAA GACTTTGTAC ATACTTCAGT TGTTATGAAA TCTTTAAAGA  
AAAAAAGAAA AAGTTACGCT **AATAAATTGC** TGTGGTGCAG G

Legend:

HPV-16 E6\*I      nt 83-226, 409-559  
HPV-16 E7        nt 562-858  
HPV-16 E1        nt 865-880  
cellular exons  
Poly-A signals    **AATAAA or ATTAAA**  
**ATTTA**            "AUUUA" motif, ARE (AU-rich element)  
nt in black       non-coding regions e.g. UTR
